# Supplementary material for: The effects of industry funding and positive outcomes in the interpretation of clinical trial results: a randomized trial among Dutch psychiatrists
Source: PubMed Central journal article supplement (PMC6749641; doi:10.1186/s12910-019-0405-7), 2019-09-18
Supplement: 12910_2019_405_MOESM2_ESM.pdf [file 12910_2019_405_MOESM2_ESM.pdf]

NCBI Resources How To Sign in to NCBI

US National Library of Medicine National Institutes of Health

PubMed  Search

Advanced Help

Display Settings: Abstract Send to:

ArXiv XXXX PsychXXXX, 2014 June;71(13):1333-40. doi: XXXXXXXXXX.

**Efficacy and safety of the novel antipsychotic vinquerine in the treatment of first-episode psychosis: a randomized, controlled multicenter trial.**

Friedman J, Gillingham GT<sup>1</sup>, Tierney JK, Vogel C, Cazorla P, Steimbeck Y.

**Author information**

**Abstract**

**CONTEXT:** Vinquerine is a recently developed antipsychotic drug with full agonistic activity at muscarinic and NMDA receptors and concomitant partial agonistic activity at dopamine2 (D2) receptors. In this multicenter prospective trial, we examined the efficacy, safety, and tolerability of vinquerine in patients with first-episode psychosis (FEP).

**METHODS:** In this 4-week double-blind open randomized study, 303 FEP patients received vinquerine (300 mg/day, n = 101), placebo (n = 103), or olanzapine (15 mg/day, n = 99). Efficacy assessments included Positive and Negative Syndrome Scale (PANSS) scores and Clinical Global Impression (CGI) scores. Safety and tolerability evaluations included assessment of extrapyramidal symptoms and effects on weight, prolactin levels, and the corrected QT (QTc) interval. Patients who discontinued treatment for any reason within 4 weeks were excluded from analysis.

**RESULTS:** Vinquerine and olanzapine resulted in significantly lower PANSS scores compared to placebo on all outcomes (olanzapine -15 points, vinquerine -17 points, P<0.01). Compared to placebo, effects on the total PANSS scores were significantly reduced after 1 week. In a direct comparison with olanzapine, PANSS positive symptom scores were significantly higher for vinquerine (vinquerine 78% decrease vs. olanzapine 54% decrease, p<0.01). A similar benefit was found for PANSS negative symptom scores (58% vs 11% decrease, p<0.01). No significant differences were present between vinquerine, olanzapine and placebo in occurrence of extrapyramidal symptoms. Mean prolactin levels decreased with vinquerine (5%) but increased 2-fold compared to olanzapine (p<0.001). Mean change in QTc interval did not differ significantly from placebo for any of the active treatment groups. Vinquerine and placebo groups showed a similarly low incidence of clinically significant weight gain, whereas weight gain (>5kg increase from baseline) was significantly increased in the olanzapine treatment group (24%, p<0.01).

**CONCLUSIONS:** Vinquerine is an effective, safe, and well-tolerated drug for the treatment of positive and negative symptoms in FEP. With a unique pharmacological profile, this novel drug represents a novel treatment option in FEP. Future research should investigate the possible benefits of vinquerine in the treatment of the negative symptoms of schizophrenia.

XXXXXXXX Press.

PMID: XXXXXXXXXX [PubMed - indexed for MEDLINE]  
This study was funded by a research grant from Olevy Pharmaceuticals.

**Publication Types, MeSH Terms, Substances**

**Save items**

Add to Favorites

**Related citations in PubMed**

**Review** Body weight and metabolic adverse effects of risperidone, lurasidone, ziprasidone, and aripiprazole. *Int J Clin Pract*. 2012

**Review** Vinquerine for schizophrenia and bipolar disorder: a review of the literature. *J Clin Psychopharmacol*. 2013

Aripiprazole versus olanzapine in people with persistent negative symptoms. *Int J Clin Psychopharmacol*. 2012

A 3-week randomized, placebo-controlled trial of vinquerine in the treatment of bipolar disorder. *J Clin Psychopharmacol*. 2014

**Review** Aripiprazole: a clinical review of a second-generation antipsychotic. *Int J Clin Psychopharmacol*. 2013

See all

**Cited by 2 PubMed Central articles**

The effects of novel and newly approved antipsychotics on serum prolactin. *Int J Clin Psychopharmacol*. 2014

Comparison of treatment outcomes associated with vinquerine, olanzapine, and aripiprazole. *Int J Clin Psychopharmacol*. 2014

**Related information**

Related Citations

Compound (MeSH Keyword)

MedGen

SF 1 Pubmed style fake abstract with positive outcome and funding disclosure

NB. the manuscript has been altered to remove references to journal title, pubmed ID, copy right, etc. where this information was the same as real world entities. In the original survey this information was unblurred to better mimic a PubMed abstract

NCBI Resources How To Sign in to NCBI

US National Library of Medicine National Institutes of Health

PubMed  Search

Advanced Help

Display Settings: Abstract Send to:

ArXiv CXXX PsychXXXX 2014 June;71(13):1333-40. doi: XXXXXXXXXXXXXXXX.

**Efficacy and safety of the novel antipsychotic vinquerine in the treatment of first-episode psychosis: a randomized, controlled multicenter trial.**

Friedman J, Gillingham GT, Tierney JK, Vogel C, Cazorla P, Steimbeck Y.

**Author information**

**Abstract**

**CONTEXT:** Vinquerine is a recently developed antipsychotic drug with full agonistic activity at muscarinic and NMDA receptors and concomitant partial agonistic activity at dopamine2 (D2) receptors. In this multicenter prospective trial, we examined the efficacy, safety, and tolerability of vinquerine in patients with first-episode psychosis (FEP).

**METHODS:** In this 4-week double-blind open randomized study, 303 FEP patients received vinquerine (300 mg/day, n = 101), placebo (n = 103), or olanzapine (15 mg/day, n = 99). Efficacy assessments included Positive and Negative Syndrome Scale (PANSS) scores and Clinical Global Impression (CGI) scores. Safety and tolerability evaluations included assessment of extrapyramidal symptoms and effects on weight, prolactin levels, and the corrected QT (QTc) interval. Patients who discontinued treatment for any reason within 4 weeks were excluded from analysis.

**RESULTS:** Vinquerine and olanzapine resulted in significantly lower PANSS scores compared to placebo on all outcomes (olanzapine -15 points, vinquerine -17 points, P<0.01). Compared to placebo, effects on the total PANSS scores were significantly reduced after 1 week. In a direct comparison with olanzapine, PANSS positive symptom scores were significantly higher for vinquerine (vinquerine 78% decrease vs. olanzapine 54% decrease, p<0.01). A similar benefit was found for PANSS negative symptom scores (58% vs 11% decrease, p<0.01). No significant differences were present between vinquerine, olanzapine and placebo in occurrence of extrapyramidal symptoms. Mean prolactin levels decreased with vinquerine (5%) but increased 2-fold compared to olanzapine (p<0.001). Mean change in QTc interval did not differ significantly from placebo for any of the active treatment groups. Vinquerine and placebo groups showed a similarly low incidence of clinically significant weight gain, whereas weight gain (>5kg increase from baseline) was significantly increased in the olanzapine treatment group (24%, p<0.01).

**CONCLUSIONS:** Vinquerine is an effective, safe, and well-tolerated drug for the treatment of positive and negative symptoms in FEP. With a unique pharmacological profile, this novel drug represents a novel treatment option in FEP. Future research should investigate the possible benefits of vinquerine in the treatment of the negative symptoms of schizophrenia.

XXXXXXXX Press.

PMID: XXXXXXXXX [PubMed - indexed for MEDLINE]

Publication Types, MeSH Terms, Substances

**Save items**

Add to Favorites

**Related citations in PubMed**

**Review** Body weight and metabolic adverse effects of atypical antipsychotics [Drug Design 2010]

**Review** Vinquerine for schizophrenia and bipolar disorder: a review of the literature [J Clin Psychopharmacol 2010]

**Asenapine versus olanzapine in people with persistent negative symptoms [J Clin Psychopharmacol 2010]**

**A 3-week, randomized, placebo-controlled trial of vinquerine in the treatment of bipolar disorder [Bipolar Disord 2010]**

**Review** Asenapine: a clinical review of a second-generation antipsychotic [Curr Ther 2010]

See all

**Cited by 2 PubMed Central articles**

The effects of novel and newly approved antipsychotics on serum prolactin [Drug Design 2010]

Comparison of side effects associated with vinquerine, olanzapine [Bipolar Disord Treat 2010]

**Related information**

Related Citations

Compound (MeSH Keyword)

SF 2 Pubmed style fake abstract with positive outcome and no funding disclosure

NB. the manuscript has been altered to remove references to journal title, pubmed ID, copy right, etc. where this information was the same as real world entities. In the original survey this information was unblurred to better mimic a PubMed abstract



NCBI Resources How To Sign in to NCBI

US National Library of Medicine National Institutes of Health

PubMed  Search

Advanced Help

Display Settings: Abstract Send to:

ArXX CXXX PsychXXX, 2014 June;71(13):1333-40. doi: XXXXXXXXXXXXXXXXXXXX.

**Efficacy and safety of the novel antipsychotic vinqerine in the treatment of first-episode psychosis: a randomized, controlled multicenter trial.**

Friedman J, Gillingham GT, Tierney JK, Vogel C, Cazorla P, Steimbeck Y.

**Author information**

**Abstract**

**CONTEXT:** Vinqerine is a recently developed antipsychotic drug with full agonistic activity at muscarinic and NMDA receptors and concomitant partial agonistic activity at dopamine2 (D2) receptors. In this multicenter prospective trial, we examined the efficacy, safety, and tolerability of vinqerine in patients with first-episode psychosis (FEP).

**METHODS:** In this 4-week double-blind open randomized study, 303 FEP patients received vinqerine (300 mg/day, n = 101), placebo (n = 103), or olanzapine (15 mg/day, n = 99). Efficacy assessments included Positive and Negative Syndrome Scale (PANSS) scores and Clinical Global Impression (CGI) scores. Safety and tolerability evaluations included assessment of extrapyramidal symptoms and effects on weight, prolactin levels, and the corrected QT (QTc) interval. Patients who discontinued treatment for any reason within 4 weeks were excluded from analysis.

**RESULTS:** Vinqerine and olanzapine resulted in significantly lower PANSS scores compared to placebo on all outcomes (olanzapine: 15 points, vinqerine: 17 points, P<0.01). Compared to placebo, effects on the total PANSS scores were significantly reduced after 1 week. In a direct comparison with olanzapine, vinqerine PANSS positive symptom scores were slightly lower for vinqerine (vinqerine 48% decrease vs. olanzapine 54% decrease, p = 0.15). A similar result was found for PANSS negative symptom scores (18% vs 11% decrease, p=0.45). No significant differences were present between vinqerine, olanzapine and placebo in the occurrence of extrapyramidal symptoms. Mean prolactin levels increased 2-fold with vinqerine but increased slightly (5%) with olanzapine (p<0.001). Mean change in QTc interval did not differ significantly from placebo for any of the active treatment groups. Placebo groups showed a low incidence of clinically significant weight gain, whereas weight gain (>5kg increase from baseline) was significantly increased in both active treatment groups (14% for vinqerine and 17% for olanzapine, p<0.01).

**CONCLUSIONS:** In this 4-week follow up study, vinqerine appeared to be effective for the treatment of positive symptoms in FEP. Nevertheless, significant increases in prolactin levels and weight gain occurred, and no significant differences were found between olanzapine and vinqerine. Future research and larger studies with a longer follow up period should investigate the possible benefits of vinqerine in the treatment of schizophrenia.

XXXXXXXX Press.

PMD: XXXXXXXX [PubMed - indexed for MEDLINE]

**Publication Types, MeSH Terms, Substances**

**Save items**

Add to Favorites

**Related citations in PubMed**

Review: Body weight and metabolic adverse effects of atypical antipsychotics. [CNS Drugs. 2012]

Review: Vinqerine for schizophrenia and bipolar disorder: a review of the literature. [Int J Clin Pract. 2013]

Asenapine versus olanzapine in people with persistent negative symptoms. [CNS Neuropharmacol. 2013]

A 4-week, randomized, placebo-controlled trial of vinqerine in the treatment of bipolar disorder. [Bipolar Disord. 2014]

Review: Asenapine: a critical review of a second-generation antipsychotic. [CNS Ther. 2013]

See all...

**Cited by 2 PubMed Central articles**

The effects of novel and newly approved antipsychotics on serum prolactin. [CNS Drugs. 2014]

Comparative of symptoms associated with vinqerine, olanzapine. [Neuropsychiatr Dis Treat. 2014]

**Related information**

Related Citations

Compound (MeSH Keyword)

SF 4 Pubmed style fake abstract with negative outcome and no funding disclosure

NB. the manuscript has been altered to remove references to journal title, pubmed ID, copy right, etc. where this information was the same as real world entities. In the original survey this information was unblurred to better mimic a PubMed abstract
